1 Strategy for Efficient Importing and Function Characterizing of  
2 Nicotinamide Adenosine Dinucleotide Analogs in *Escherichia*  
3 *coli* Cells

4

5 Lei Wang,<sup>a</sup> Bin Liu,<sup>a</sup> Yuxue Liu,<sup>b</sup> Yue Sun,<sup>a</sup> Shanshan Zhang,<sup>a</sup> Dayu Yu,<sup>a</sup> Zongbao  
6 K. Zhao<sup>b</sup>

7

8 <sup>a</sup> School of Chemical Engineering, Northeast Electric Power University, Jilin 132012,  
9 China

10 <sup>b</sup> Division of Biotechnology, Dalian Institute of Chemical Physics, CAS, Dalian  
11 116023, China

12 Address correspondence to Dayu Yu, [yudy@neepu.edu.cn](mailto:yudy@neepu.edu.cn), and Zongbao K. Zhao,  
13 [zhaozb@dicp.ac.cn](mailto:zhaozb@dicp.ac.cn).

14 **ABSTRACT**

15 Nicotinamide adenosine dinucleotide (NAD) and its phosphorylated form (NADP) are  
16 essential metabolites that are key cofactors for many redox enzymes and co-substrates  
17 for several protein modification enzymes. It is difficult to study and manipulate the  
18 functions of NAD(P), because these cofactors participate in complex metabolic  
19 network. NAD analogs can reduce the complexity by bioorthogonalization of  
20 metabolic modules and enhance our ability to understand and regulate the  
21 bioenergetic and signaling pathways mediated by NAD. But the design and  
22 application of NAD analogs is limited because these compounds cannot be easily  
23 delivered into cells. Here we explored the strategy to import those adenine-replaced  
24 NAD analogs (NXDs) into *Escherichia coli* cells. We showed that the transporter  
25 NTT4 derived from *Protochlamydia amoebophila* was efficient for NXDs import. By  
26 constructing an *ushA*-deletion mutant, we improved extracellular stability of NXDs  
27 significantly and realized continuous import upon concurrent expression of NTT4.  
28 The *in vivo* functions of NXDs were then characterized in *E. coli* cells. Nicotinamide  
29 guanine dinucleotide was identified as an inhibitor of NAD synthesis and can partially  
30 support cell growth of an NAD-auxotrophic *E. coli* strain. Nicotinamide cytosine  
31 dinucleotide was proved an excellent energy transporter with distinct bioorthogonality  
32 biocompatibility. The efficient importing system will stimulate developing and  
33 screening of functional NXDs.

34 **IMPORTANCE** NAD analogs are important tools for manipulating the bioenergetic  
35 and signaling pathways mediated by NAD, but they have to be imported into cells as  
36 these compounds are membranes impermeable. The efficiency of importing NAD  
37 analogs into cells can be conspicuously improved by limiting extracellular  
38 degradation while expressing an efficient NAD importer. Then the potential  
39 application of the analogs can be preliminarily forecasted according to their *in vivo*  
40 characters. That is, the analog similar to NAD is candidate regulator of NAD  
41 metabolism, while analog has bare interference with natural system may serve as  
42 bioorthogonal energy carrier. In summary, we explore a strategy for continuous and  
43 efficient importing of NAD analogs and this work will facilitate the characterization  
44 and utilization of NAD analogs.

45

46 **KEYWORDS** NAD analog, nicotinamide guanine dinucleotide, nicotinamide  
47 cytosine dinucleotide, cofactor manipulation, cofactor transporter, cofactor stability

## 48 INTRODUCTION

49 Nicotinamide adenosine dinucleotide (NAD, Fig. 1a) and its phosphorylated form  
50 (NADP) are natural pyridine nucleotide cofactors, which play a central role in biology.  
51 They are essential metabolites participating in both bioenergetic and signaling  
52 pathways (1, 2). But efforts to study the roles of NAD(P) have proven difficult  
53 because these cofactors are subjected to tight regulation and participate in complex  
54 metabolic network. Cofactor analogs are general tools for study and alteration of  
55 cofactor functions, yet such efforts are limited because these compounds cannot be  
56 easily delivered into cells (3-5).

57 As a pivotal class of cofactors in bioenergetic pathways, pyridine nucleotide  
58 cofactors such as NAD and its reduced form NADH function as essential electron  
59 acceptors or donors in numerous catabolic and anabolic reactions. They also play  
60 critical roles in maintaining intracellular redox homeostasis. When modification or  
61 introduction of metabolic pathways affects the level of NAD/NADP or redox state,  
62 the cellular metabolism will be dramatically influenced, resulting in decreased  
63 robustness and biosynthetic capacity (2, 6, 7). One promising way for avoiding  
64 interference between the target cofactor dependent system and natural systems is  
65 constructing bioorthogonal redox metabolic circuits based on NAD analogs. For  
66 example, nicotinamide cytosine dinucleotide (NCD, Fig. 1a) wired metabolic circuits  
67 can transfer energy pathway-selectively and shift the reaction equilibrium with little  
68 interference with natural systems (4, 5).

69 NAD metabolism plays important roles in the maintenance of NAD pools and  
70 has beneficial effects on regular calorie restriction on health span (1, 8). The  
71 correlated enzymes are potential drug target for anticancer or antipathogen therapy (9,  
72 10). However, characterizing the molecular mechanisms that underlie the complex  
73 regulation of NAD metabolism remain unclear. Many efforts are focused on the  
74 development of pyridine nucleotide cofactor analogs to serve as effective functional  
75 and mechanistic probes in the cellular environment. Recombinant human  
76 nicotinamide adenylyl transferase 1 (Nmnat1) was employed to condense  
77 nicotinamide mononucleotide and tzATP to yield NtzAD (11). Nmnat3 could  
78 synthesize nicotinamide guanine dinucleotide (NGD, Fig. 1a) (12). However, the  
79 biological functions of these analogs are difficult to be investigated by exogenously  
80 addition, because pyridine nucleotide cofactors are membranes impermeable (13).  
81 Our ability to experimentally control *in vivo* specific pyridine nucleotide cofactor

82 concentrations could enhance our understanding and application of  
83 cofactor-dependent reactions.

84 Synthesis of pyridine nucleotide cofactors using corresponding membranes  
85 permeable nucleosides via NAD salvage pathway is one possible route to the  
86 introduction of pyridine nucleotide cofactors into cells. For example, *in vivo* NGD has  
87 been verified in mice overexpressing *Nmnat3* (13). However, recognition of  
88 corresponding nucleosides by the salvage pathway may not be sufficient, and the  
89 salvage pathways relying on the activation of free nucleosides to produce the desired  
90 pyridine nucleotide cofactor is less than optimal (13). This will increase the challenge  
91 of achieving controlled intracellular concentrations of the pyridine nucleotide cofactor,  
92 which is likely to limit many applications. In general, study and application of  
93 pyridine nucleotide cofactor analogs desires general means to directly introduce the  
94 cofactors into cells.

95 Many NAD transporters have been discovered in both prokaryote and eukaryote  
96 organisms, such as the first NAD transporter reported NTT4 derived from the  
97 prokaryote chlamydial endosymbiont *Protochlamydia amoebophila* UWE25 (14), and  
98 NAD transporters discovered in the eukaryotes *Saccharomyces cerevisiae*, and  
99 *Arabidopsis thaliana* located at mitochondria or chloroplasts (12, 15). These  
100 transporters import intact NAD(H) in counter exchange with ADP for cells or  
101 organelles, and they are potential candidates for importing pyridine nucleotide  
102 cofactor analogs. The characterization of cofactor transporters are generally carried  
103 out in model organism *Escherichia coli* (5, 14, 16-18). Recombinant expression of the  
104 NAD transporter from *A. thaliana* mitochondria (*AtNDT2*) in *E. coli* functions to  
105 import exogenously added NCD, but it can only get 0.059 mM intracellular NCD in  
106 the presence of 0.1 mM exogenous NCD (5). More efficient importing strategy is  
107 desired for further application of pyridine nucleotide cofactor analogs.

108 Stability is also a key character for efficiency of cofactors import. In many  
109 prokaryote and eukaryote organisms, the extracellular pyrophosphatase hydrolyzes  
110 the pyrophosphate bond of pyridine nucleotide cofactors and catalyzes further  
111 hydrolysis to permeable nicotinamide riboside (NR) and nucleosides (19, 20). To  
112 limit or compensate extracellular decomposition of the cofactors, import of cofactors  
113 is generally carried out by decreasing operating time (14, 17, 21) or supplying excess  
114 cofactors to the cultural medium (17, 22). As the main pyrophosphatases are generally  
115 coded by one or two genes (19, 20, 23, 24), simple gene deletion may significantly

116 improve cofactor stability.

117 Here we optimize the importing efficiency of pyridine nucleotide cofactors in *E.*  
118 *coli* by choosing an efficient transporter and deleting *ushA* gene encoding the main  
119 pyrophosphatase for the decomposition of exogenous cofactors. Then pyridine  
120 nucleotide cofactors can be directly introduced in a continuous and efficient way. We  
121 import NAD analogs with the adenine replaced by other bases (NXDs, Fig. 1A) via  
122 the strategy, and then characterize biological functions of NXDs.

## 123 **RESULTS**

### 124 **Identification of efficient NAD analog transporter**

125 Among the well characterized NAD transporters, AtNDT2 derived from *A.*  
126 *thaliana* mitochondria shows the widest substrate spectrum and the highest activity  
127 (12, 15). AtNDT2 has been applied to importing NCD for construction of *in vivo*  
128 metabolic circuits, but the importing efficiency is insufficient for further study and  
129 application (5). To date, *P. amoebophila* UWE25 derived NTT4 has been proved an  
130 excellent NAD transporter by heterologous expression in *E. coli*, but its substrate  
131 spectrum has not been well studied (14, 22).

132 To evaluate the importing efficiency of NAD analogs by AtNDT2 and NTT4, four  
133 NXDs was designed by substituting the adenine group of NAD with natural bases  
134 (Fig. 1A). The NXD with natural base might have excellent biocompatibility and can  
135 be synthesized via modified endogenetic NAD salvage pathways (13), which will  
136 facilitate *in vivo* applications of characterized NXDs. Based on the structure similarity,  
137 NAD and NGD with purine group might have similar character, and possess different  
138 properties toward NCD, NTD and NUD with pyrimidine group. NAD and NCD were  
139 chosen for preliminary design and characterization of efficient NXD import strategy.

140 The cofactor transporting efficiency of NTT4 and AtNDT2 was compared by  
141 expressing the transporters with constitutive promoter *gntT105P* of the plasmid  
142 pBCTD in the strains WL023 and WL024, respectively. To correct for endogenetic  
143 synthesis of NAD, we subtracted the background NAD concentration from the control  
144 strain incubated without exogenous cofactors. Compared with AtNDT2, NTT4 was a  
145 more efficient transporter for both NAD and NCD (Fig. 1B). With 0.1 mM  
146 exogenously added cofactors, NTT4 increased the cellular NAD and NCD level by

147 1.8 mM and 1.2 mM, respectively, while AtNDT2 only increased the cellular NAD  
148 and NCD level by 0.5 mM and 0.1 mM, respectively. Both NTT4 and AtNDT2  
149 preferred NAD to NCD. NTT4 could concentrate exogenous cofactor into cells via  
150 counter exchange with ADP, and made an 12 fold higher intracellular NCD  
151 concentration than the exogenously added 0.1 mM NCD.

152 NCD is primarily designed for pathway specific energy transformation in cellular  
153 environment, and its influence on cell growth will affect the *in vivo* application. NCD  
154 had no detectable influence on cell growth of WL023 when exogenously added at 0.1  
155 mM, which indicated that NCD has an excellent biocompatibility.

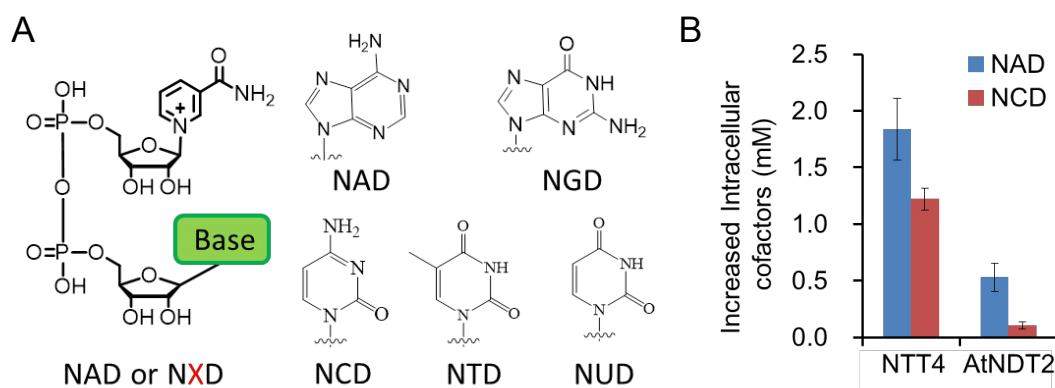

156 **FIG 1** Identification of efficient NAD analog transporter. (A) Structure of pyridine nucleotide  
157 cofactors used for the importing assay. Nucleobases are shown separately for clarity. NAD,  
158 nicotinamide adenosine dinucleotide; NGD, nicotinamide guanine dinucleotide; NCD,  
159 nicotinamide cytosine dinucleotide; NTD, nicotinamide thymine dinucleotide; NUD, nicotinamide  
160 uracil dinucleotide. (B) Cellular cofactor level increments of *E. coli* WL023 or WL024 having  
161 NTT4 or AtNDT2 overexpressed. Cells were incubated in the presence of 0.1 mM cofactor at  
162 30 °C for 8 h. The data represent the average standard deviations of three independent  
163 experiments.

## 164 Reducing extracellular cofactor degradation

165 Because NAD analogs are added extracellularly for further *in vivo* utilization,  
166 their stability in the environment has to be evaluated. As UshA is a major periplasmic  
167 enzyme for NAD degradation in *E. coli*, it is expected that cofactor degradation  
168 should be significantly reduced of the *ushA* deletion mutant (Fig. 2A). As storage at  
169 -80 °C had little influence on intracellular cofactor and cofactor uptake (Fig. 2B), the  
170 frozen cells were used for investigating cofactor uptake.

171 Extracellular NAD and NCD stability in the presence of wild type strain cells

172 (YJE004) and *ushA*-deletion mutant cells (WL023) was compared by determining the  
173 time course of NAD and NCD degradation (Fig. 2C, D). When NAD and NCD were  
174 incubated with WL023 cells for 12 h, the cofactors kept stable and the residual NAD  
175 and NCD concentration kept at 37  $\mu$ M and 23  $\mu$ M, respectively. When incubated with  
176 YJE004 cells, NAD and NCD were almost completely degraded within 6 h and 4 h,  
177 respectively. These data demonstrated that the deletion of the *ushA* gene improved  
178 extracellular NAD stability, which should be beneficial to the efficiency of pyridine  
179 nucleotide cofactor analogs import. NAD was more stable than NCD in both cells  
180 with or without UshA, because a bigger group at nucleotide side enhanced stability of  
181 NAD (19).

182 Corresponding to extracellular NAD and NCD degradation, detectable import of  
183 NAD and NCD by YJE004 cells were stopped at 5 h and 2 h, respectively. Meanwhile,  
184 WL023 cells could import NAD and NCD in a continuous and efficient way (Fig. 2E,  
185 F). Variation of NADH during the importing course had little influence on total  
186 NAD(H) level, so only the levels of oxidized cofactors were considered. For NAD,  
187 YJE004 cells maximally increased the intracellular NAD concentration by 1.4 mM at  
188 6 h, while WL023 cells increased intracellular NAD concentration by 2.8 mM at the  
189 same time, and the concentration reached to 3.3 mM at 12 h. For NCD, YJE004 cells  
190 maximally increased intracellular NCD concentration by 0.34 mM at 4 h, while  
191 WL023 cells increased intracellular NCD concentration by 0.95 mM at the same time,  
192 and the concentration reached to 2.0 mM at 12 h. Though there were residual gene(s)  
193 responsible for extracellular NAD analog degradation outside WL023 cells, the  
194 present stability of NAD analog is sufficient for continuous import.

195 As NCD can not be synthesized by *E. coli*, NCD was employed as an indicator  
196 of intracellular degradation activity in rest cells. The intracellular NCD decreased  
197 from 0.34 mM at 4 h to 0.30 mM at 12 h, which suggest cofactors is more stable in  
198 rest cell cytoplasm than in extracellular environment.



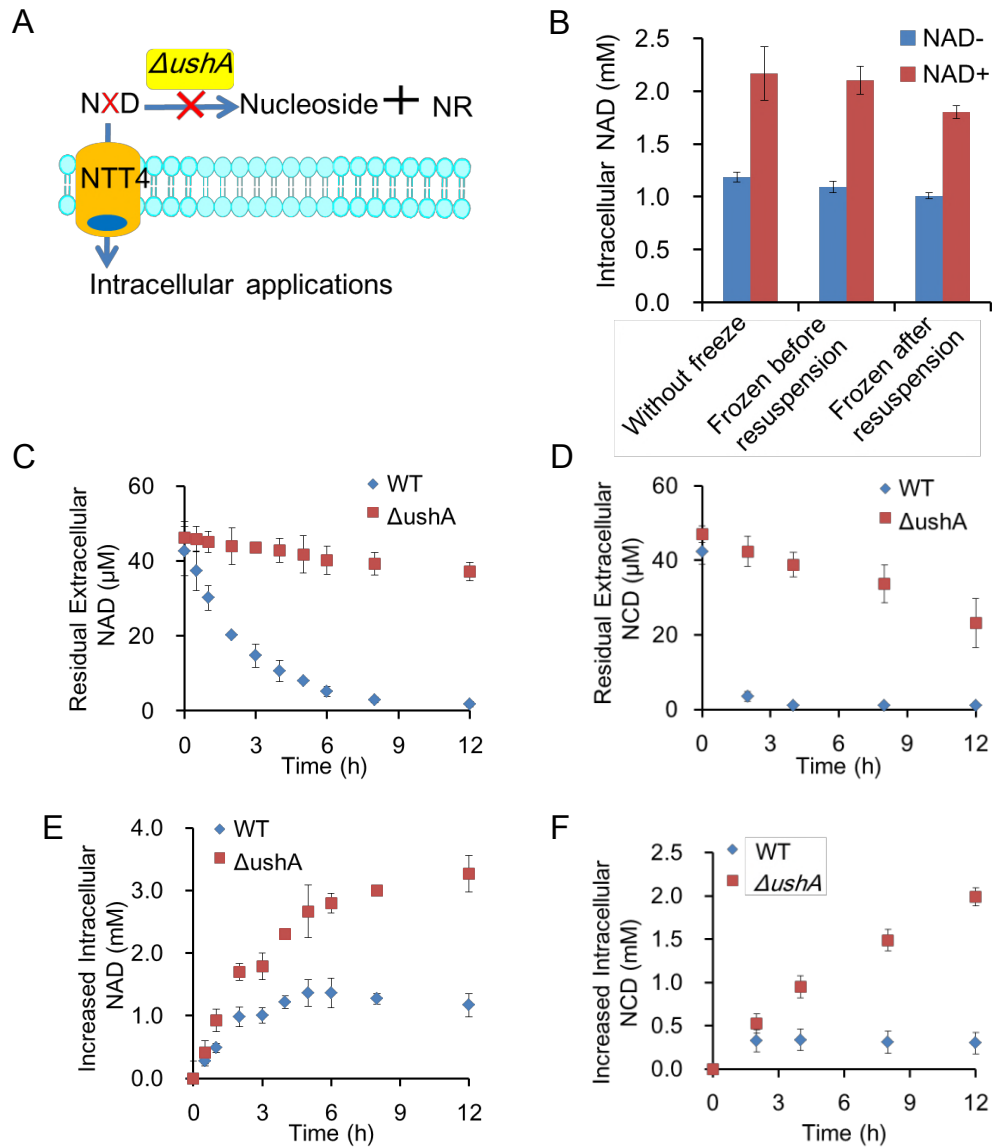

199 **FIG 2** Reducing extracellular cofactor degradation. (A) Reducing cofactor degradation by *ushA*  
 200 deletion. (B) Influence of storage at  $-80^{\circ}\text{C}$  on cofactor uptake by WL023. *E. coli* cells at an  
 201 initial  $\text{OD}_{600}$  of 1 in MOPS medium were prepared as followed: freshly (Without freeze), stored at  
 202  $-80^{\circ}\text{C}$  for 7 days before being suspended (Frozen before resuspension) and suspended in MOPS  
 203 medium then stored at  $-80^{\circ}\text{C}$  for 7 days (Frozen after resuspension). Then the cells were mixed  
 204 with or without  $50\ \mu\text{M}$  of NAD for 8 h at  $30^{\circ}\text{C}$ . (C, D) Time course of cofactor degradation by  
 205 YJE004 and WL023 cells. (E, F) Time course of cofactor import by YJE004 and WL023 cells.  
 206 YJE004, wild type; WL023, *ushA*-deletion mutant. Cells were incubated in the presence of  $50\ \mu\text{M}$   
 207 cofactor at  $30^{\circ}\text{C}$ . The data represent the average standard deviations of three independent  
 208 experiments.

## 209 Apparent kinetics of cofactor transportation by NTT4

210 The impact of cofactor stability on apparent cofactor affinity of NTT4 ( $K_m$ ) was

211 characterized (Table 1). Cofactor stability enhanced apparent affinity of cofactor  
212 transportation by NTT4 and guaranteed sustainable import. Importing time had little  
213 effect on uptake of NAD by WL023 cells, and NAD uptake for 4 h and 8 h occurred  
214 at a high apparent affinity ( $K_m$  of 6  $\mu\text{M}$ ). With the cofactor stability decreasing, the  
215 apparent affinity became sensitive to importing time. When the uptake time of NAD  
216 by YJE004 extended from 4 h to 8 h, the apparent  $K_m$  rose from 8  $\mu\text{M}$  to 12  $\mu\text{M}$ . As  
217 the stability of NCD was much lower than that of NAD, uptake of NCD by WL023  
218 cells was also sensitive to importing time, and the  $K_m$  rose from 23  $\mu\text{M}$  to 84  $\mu\text{M}$   
219 when importing time changed from 4 h to 8 h. According to the data, cofactor stability  
220 is critical for sustainable cofactor import.

221 **TABLE 1** Apparent kinetic parameters of NTT4 <sup>[a]</sup>

| Cofactor           | Strain                | Time (h) | $K_m$ ( $\mu\text{M}$ ) | V max (mM/h)     |
|--------------------|-----------------------|----------|-------------------------|------------------|
| NAD <sup>[b]</sup> | YJE004 <sup>[c]</sup> | 4        | 8.0 $\pm$ 1.0           | 0.53 $\pm$ 0.050 |
|                    |                       | 8        | 12 $\pm$ 2.0            | 0.80 $\pm$ 0.050 |
|                    | WL023 <sup>[c]</sup>  | 4        | 6.0 $\pm$ 0.20          | 0.40 $\pm$ 0.030 |
|                    |                       | 8        | 6.1 $\pm$ 0.40          | 1.0 $\pm$ 0.10   |
| NCD <sup>[b]</sup> | WL023 <sup>[c]</sup>  | 4        | 23 $\pm$ 5.1            | 0.30 $\pm$ 0.090 |
|                    |                       | 8        | 84 $\pm$ 17             | 0.63 $\pm$ 0.070 |

222 [a] Cells were incubated with varying concentrations of NAD or NCD for 4 h or 8 h at 30 °C,  
223 and then were pelleted and washed before extracting intracellular cofactor. The resulting curves  
224 were fit to the Michaelis–Menten equation to determine apparent  $K_m$  and apparent  $V_{max}$  values.  
225 Assays were done in triplicate and the data represent the average  $\pm$  standard deviation. [b] NAD  
226 and NCD concentration ranged from 5  $\mu\text{M}$  to 1000  $\mu\text{M}$ . [c] YJE004, wild type; WL023,  
227 *ushA*-deletion mutant.

## 228 **Characterizing NTT4 binding of NXD**

229 The efficient cofactor importing strain WL023 may be also applicable to import  
230 of other NXDs with purine group or pyrimidine group. The binding of NXDs to  
231 NTT4 was characterized by inhibition of the uptake of NAD (Fig. 3A) (14, 25).  
232 WL023 cells were incubated with 50  $\mu\text{M}$  of NAD and a 10 fold excess of the NXD.  
233 NGD potently inhibited NAD uptake (89.9% inhibition), while NCD, NTD and NUD  
234 inhibited uptake much less efficiently (37.0%, 43.6% and 52.8% inhibition,  
235 respectively). Based on this competitive inhibition data, NTT4 had broad affinity to  
236 NXDs, and preferred NXDs with purine group (NAD and NGD) to NXDs with  
237 pyrimidine group (NCD, NTD and NUD).

238       The impact of NXD on intracellular NAD concentration was assayed by strains  
239 with (WL023) or without (WL022) NTT4 (Fig. 3B). When supplemented with 0.5  
240 mM of NXD, little impact on the intracellular NAD concentration of WL022 cells  
241 was detected, and the concentration varied between 1.1 mM and 1.3 mM. A possible  
242 reason is the degradation of NXDs to membranes permeable precursors was slow, and  
243 the following stimulation for NAD synthesis by passive uptake of the precursors was  
244 negligible. When supplemented 0.5 mM of NXD to WL023 cells, NCD, NTD and  
245 NUD increased intracellular NAD concentration approximately by 42%. The increase  
246 of intracellular NAD concentration might due to NR or nucleosides produced by  
247 intracellular degradation of NXD, and the hypothesis was confirmed by the impact of  
248 NXD precursors on intracellular NAD concentration (Fig. 3C). NR, nicotinamide and  
249 nicotinic acid stimulated synthesis of NAD, and increased intracellular NAD  
250 concentration approximately by 1 fold, which is consistent with the phenomenon in  
251 mice and humans (26). Meanwhile, the NAD precursors had no impact on NAD  
252 uptake (Fig. 3C), which suggested the nucleotide precursors had little impact on NAD  
253 metabolism.

254       When supplemented WL023 cells with 0.5 mM of NGD, the intracellular NAD  
255 concentration was lower than the sample without NGD (Fig. 3D, p-value=0.002). This  
256 suggested NGD potently inhibited intracellular NAD synthesis. Intact NGD was  
257 necessary for the inhibition of NAD synthesis, and its degradation products  
258 (guanosine and NR) did not impress NAD synthesis (Fig. 3D).

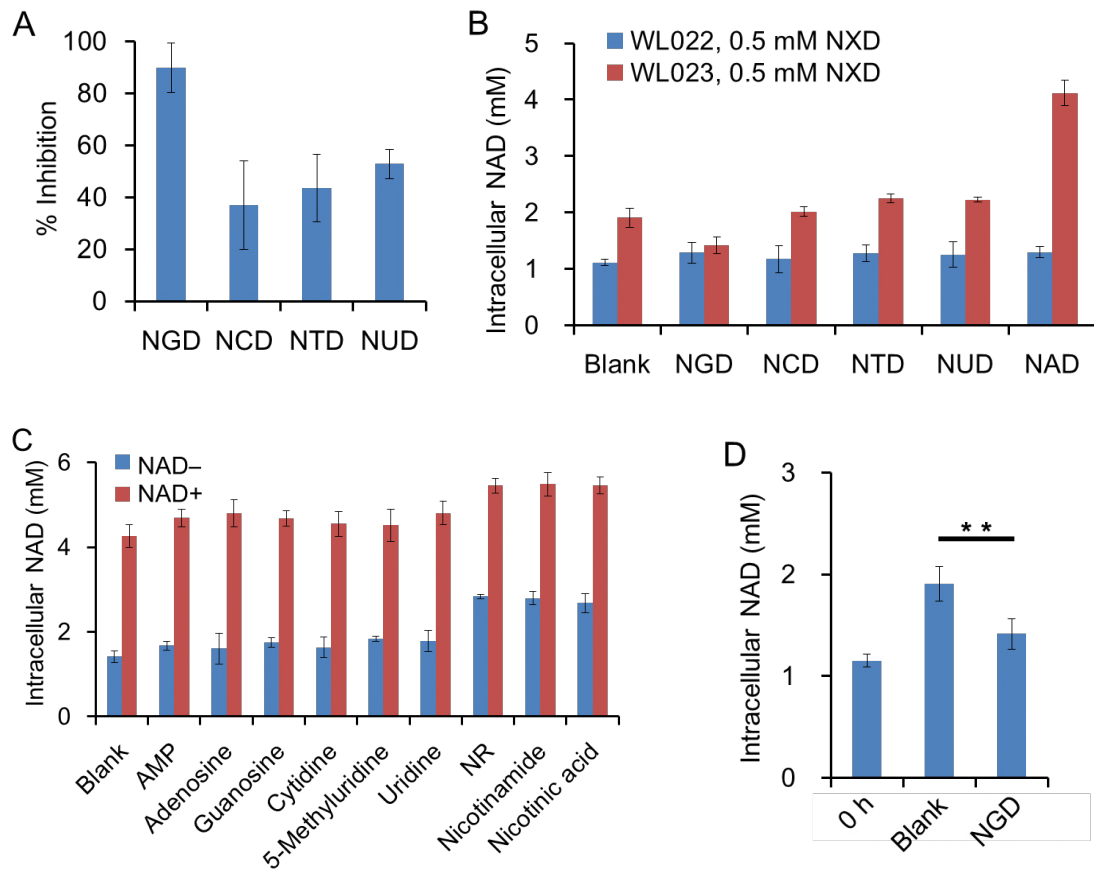

259 **FIG 3** Effects of NXD on NAD import. (A) Percent inhibition of NAD import by the NXDs.  
 260 WL023 cells were mixed with 500  $\mu$ M of NXD and 0 or 50  $\mu$ M of NAD. (B) Influence of NXD  
 261 import on intracellular NAD concentration. *E. coli* WL023 or WL022 with or without NTT4 were  
 262 mixed with 0.5 mM of NXD. (C) Impact of NXD precursors on intracellular NAD concentration  
 263 and uptake of NAD. WL023 cells were mixed with 500  $\mu$ M of precursors and 0 or 50  $\mu$ M of NAD.  
 264 NR, nicotinamide riboside. (D) Impact of NGD on intracellular NAD concentration and uptake of  
 265 NAD. Statistical significance testing was carried out by paired two-sample t-tests with Excel.  
 266 \*\*p-value<0.01. WL023 cells were mixed with or without 0.5 mM of NGD. All the assays were  
 267 carried out at an initial OD<sub>600</sub> of 1 in MOPS medium, and incubated with agitation at 30 °C for 8 h.  
 268 The data represent the average standard deviations of three independent experiments.

### 269 Utilization of NXD by *E. coli*

270 Besides NAD and NADP, *in vivo* NCD and NGD have also been reported  
 271 recently (5, 13), but the physiological functions of NCD and NGD have not been  
 272 studied.

273 The potential of NXD to substitute some functions of NAD was determined in  
 274 NAD auxotrophic mutant YJE003. With proliferation of YJE003 cells, the preloaded  
 275 NAD was distributed into daughter cells, and the proliferation terminated until the

276 cellular NAD concentration was insufficient for supporting cell growth (22). If a  
277 NXD can substitute some functions of NAD, YJE003 cells supplemented with the  
278 NXD may generate more daughter cells than cells without additional cofactor  
279 supplied. Though YJE003 still possessed the *ushA* gene, the importing efficiency of  
280 YJE003 would be sufficient for the experimental purpose.

281 The YJE003 cells were cultivated with 50  $\mu\text{M}$  of exogenous NXD at an initial  
282  $\text{OD}_{600}$  of 0.3 (Fig. 4A). The cell density of YJE003 increased to 2.5 fold in LB  
283 medium without cofactor supplementation, and grew to an  $\text{OD}_{600}$  of 1.5 with NAD.  
284 YJE003 cells supplied with NCD, NTD and NUD had similar cell density with the  
285 control without supplement of cofactors, so the NXDs with pyrimidine group barely  
286 participated in cell metabolism. The cell density of YJE003 with NGD were 0.12  
287 higher than the control without cofactor (p-value=0.04). The data suggested NGD  
288 could participate in some growth metabolism and substitute some functions of NAD  
289 during cell proliferation. The intracellular NAD concentration of cells with an initial  
290  $\text{OD}_{600}$  of 0.3 was detected. NGD and NXDs with pyrimidine group had no  
291 contribution to intracellular NAD concentration (less than 0.069 mM, Fig. 4B), while  
292 the NAD supplied cells had an intracellular NAD concentration as high as 0.8 mM.

293 NXD may also influence uptake of NAD by YJE003 cells. YJE003 cells were  
294 cultured with 50  $\mu\text{M}$  NAD and 500  $\mu\text{M}$  NCD or NGD at an initial  $\text{OD}_{600}$  of 0.3, and  
295 the growth and intracellular NAD concentration was monitored (Fig. 4C, D). As  
296 demonstrated above, NXD could not directly influence intracellular NAD  
297 concentration of YJE003, whose NAD salvage pathway was blocked. NXD might  
298 affect NAD utilization by adjusting uptake and stability of exogenously added NAD.  
299 NGD inhibited the uptake of NAD, which resulted in lower cell density (p-value=0.02)  
300 and intracellular NAD concentration. In contrast, NCD enhanced cell growth  
301 (p-value=0.05) and utilization of NAD. As NCD is an inhibitor of NAD uptake, NCD  
302 might protect NAD from being degraded by YJE003 cells. According to the residual  
303 NAD in culture medium (Fig. 4E), there remained 13  $\mu\text{M}$  of NAD in the medium  
304 supplemented with excess 0.5 mM NCD besides 50  $\mu\text{M}$  NAD. Meanwhile, the  
305 cultures supplemented with NGD or without NXD kept less than 6  $\mu\text{M}$  of NAD. NGD  
306 was not a good protector for NAD, because the guanine group of NGD is bigger than  
307 adenine, and UshA expressed by YJE003 preferred NAD to NGD.

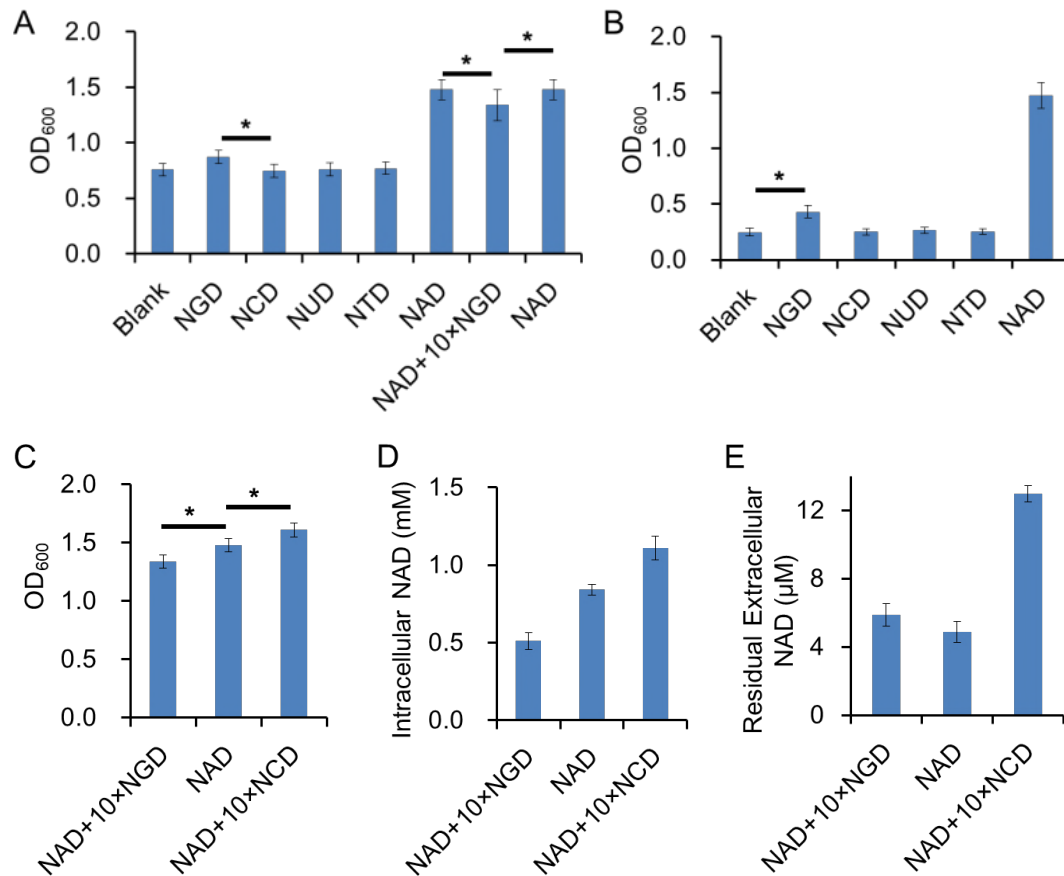

308 **FIG 4** Effects of NXD on cell growth and NAD import of *E. coli* YJE003. A) Cell density of  
 309 YJE003 cells grown for 12 h in the presence of 50 μM of NAD or NXD. Statistical significance  
 310 testing was carried out by paired two-sample t-tests with Excel. \*p-value<0.05. B) Intracellular  
 311 NAD concentration of YJE003 incubated with 50 μM of NAD or NXD. C) Cell density of  
 312 YJE003 cells grown for 12 h in the presence of 50 μM of NAD and 0.5 mM NGD or NCD.  
 313 Statistical significance testing was carried out by paired two-sample t-tests with Excel.  
 314 \*p-value<0.05. D) Intracellular NAD concentration of YJE003 incubated with 50 μM of NAD and  
 315 0.5 mM NGD or NCD. E) Residual extracellular NAD concentration of YJE003 incubated with 50  
 316 μM of NAD and 0.5 mM NGD or NCD. YJE003 cells were incubated into LB medium with an  
 317 initial OD of 0.3 and cultivated with shaking for 12 h at 30 °C. The data represent the average  
 318 standard deviations of three independent experiments.

## 319 DISCUSSION

320 Efficient import of pyridine nucleotide cofactor analogs will enhance our ability  
 321 to control *in vivo* modified pyridine nucleotide cofactor concentrations. To expand the  
 322 strategy to other organisms, the optimal transporter may be varying, but NTT4 may be  
 323 practical for most bacteria. Single deletion of *ushA* in *E. coli* greatly increased

324 stability of exogenous NXDs, and such strategy may also be practical for other  
325 organisms, for example deletion of CD37 in human cells may decrease the  
326 degradation of extracellular NAD analogs (20). Cofactor decomposition prefers  
327 cofactors with bigger group at nucleotide side (19). So NAD was more stable than  
328 NCD and excess amount of NCD could improve stability of exogenous added NAD.  
329 Meanwhile NGD with bigger nucleotide group has little improvement on NAD  
330 stability. That is, we have to design cofactor analogs with bigger group at nucleotide  
331 side for higher stability or design analogs with smaller group as protectors of target  
332 cofactor. According to *in vivo* NCD degradation, there is little pyrophosphatase  
333 activity inside cell, so efficient import of NXDs is an alternative strategy for  
334 improving NXD stability.

335 The NAD auxotrophic mutant YJE003 can be employed to screening different  
336 NAD analogs for studying or regulating NAD relevant metabolism. The analogs  
337 promoting proliferation of YJE003 cells should substitute some functions of NAD for  
338 cell growth, so they may have similar characters with NAD. Such analogs are  
339 candidate regulator of NAD metabolism. For example, NGD is an inhibitor of NAD  
340 synthesis, and it supplies a new tool for understanding NAD metabolism and  
341 regulating NAD-dependent reactions. As tumor cells are more dependent on the NAD  
342 salvage pathways (10), NGD may serve as anticancer therapy with low toxicity. The  
343 analogs having little effect on proliferation of YJE003 cells may have bare  
344 interference with natural systems. Such analogs may be applied to set bioorthogonal  
345 energy transfer system for metabolic engineering and may provide additional control  
346 mechanism for life. For example, NCD has been proved an excellent bioorthogonal  
347 cofactor with good biocompatibility and bioorthogonality, and it has already been  
348 used as a pathway specific energy carrier with little interference toward natural  
349 systems (5).

350 The efficient importing strategy can stimulate developing and screening of  
351 functional modified pyridine nucleotide cofactors, and it will facilitate the general  
352 utility of the analogs in the field of cofactor metabolism studies and synthetic biology  
353 applications.

## 354 MATERIALS AND METHODS

### 355 Reagents

356 Pyridine nucleotide cofactors were chemically synthesized as previously reported  
 357 (4). All other reagents and enzyme substrates were from Sigma. Recombinant  
 358 His-tagged Mae\* (L310R/Q401C mutant of *E. coli* derived malic enzyme) was  
 359 expressed and purified as previously reported (5, 28).

### 360 Bacterial strains and plasmids

361 The strains and plasmids used are listed in Table 2. Deletion of *ushA* was  
 362 performed originally from the strain JW0469 with *ushA::kan* mutant as described  
 363 previously (29, 30). The colonies of *E. coli* strains were cultivated for 12 h with  
 364 agitation at 30 °C, 200 rpm in LB broth, and appropriate antibiotics were added  
 365 (Kanamycin sulfate, 50 µg/mL; ampicillin, 100 µg/mL) if necessary. The cells from  
 366 100 mL of cultures were harvested by centrifugation at 4000 × g for 6 min at 4 °C,  
 367 washed twice and suspended with MOPS medium (5) to an optical density at 600 nm  
 368 (OD<sub>600</sub>) of 20. The cells were stored at –80 °C before use.

369

370 **TABLE 2** Strains and plasmids used in this study

| Strain or plasmid      | Genotype or characteristic                                                                                                              | Reference or source |
|------------------------|-----------------------------------------------------------------------------------------------------------------------------------------|---------------------|
| <i>E. coli</i> Strains |                                                                                                                                         |                     |
| BW25113                | <i>rrnB3</i> , $\Delta$ <i>lacZ4787</i> , <i>hsdR514</i> , $\Delta$ ( <i>araBAD</i> )567,<br>$\Delta$ ( <i>rhaBAD</i> )568 <i>rph-1</i> | CGSC                |
| BL21(DE3)              | F <sup>-</sup> , <i>dcm</i> , <i>ompT</i> , <i>hsdS</i> (rB <sup>-</sup> , mB <sup>-</sup> ), <i>gal</i> , $\lambda$ (DE3)              | Novagen             |
| JW0469                 | BW25113/ <i>ushA::Kan</i>                                                                                                               | 5                   |
| WL020                  | BW25113/ $\Delta$ <i>ushA</i>                                                                                                           | This study          |
| YJE003                 | BW25113/pET15K-NTT4, <i>nadE::cat</i>                                                                                                   | 8                   |
| YJE004                 | BW25113/pBCTD-NTT4                                                                                                                      | 9                   |
| WL022                  | WL020/pBCTD                                                                                                                             | This study          |
| WL023                  | WL020/pBCTD-NTT4                                                                                                                        | This study          |
| WL024                  | WL020/pBCTD-AtNDT2                                                                                                                      | This study          |
| Plasmids               |                                                                                                                                         |                     |
| pET24b-Mae*            | With Mae* inserted between NdeI and XhoI sites                                                                                          | 1                   |
| pBCTD                  | Expressing gene by <i>gnt105p</i> promoter                                                                                              | 9                   |
| pBCTD-AtNDT2           | <i>AtNDT2</i> under <i>gnt105p</i> promoter, <i>AtNDT2</i> expression, <i>kan</i>                                                       | 2                   |
| pBCTD-NTT4             | <i>ntt4</i> under <i>gnt105p</i> promoter, NTT4 expression, <i>kan</i>                                                                  | 9                   |

371



## 372 **Import of pyridine nucleotide cofactors**

373 *E. coli* samples were assayed at an initial OD<sub>600</sub> of 1 in MOPS medium. For each  
374 sample, cells were mixed with 100 µM or 50 µM of NXD. The mixture was incubated  
375 with agitation at 30 °C for certain time course. The cells were collected and washed  
376 with ice-cold PBS buffer and used for intracellular NAD or NCD measurements.  
377 Supernatants were quenched by adding 0.1 volume of 2 M HCl and incubated at  
378 50 °C for 10 min, then the mixtures were neutralized by 0.1 volume of 1 M NaOH.  
379 All the samples were stored at -80 °C before NAD or NCD concentration analysis.  
380 The cell density was correlated to the intracellular volume with 0.63 mL/L equivalent  
381 to an OD<sub>600</sub> of 1 (31).

## 382 **Analytic methods**

383 NAD and NCD were assayed by enzymatic cycling assays. NAD concentration  
384 was assayed by ADH as described previously<sup>31</sup>. NCD was assayed by Mae\*, and the  
385 mixture contained 1 M Tris-Cl (pH 7.5), 0.4 mM  
386 3-(4,5-dimethylthiazol-2-yl)-2,5-diphenyl tetrazolium bromide, 1 mM phenazine  
387 ethosulfate, 5 mM malate, 10 mM MgCl<sub>2</sub> and 1.7 U/L Mae\*. The reaction was started  
388 by mixing 10 µL of sample with 90 µL of above mixture. Reaction rates were  
389 determined by monitoring the increase of absorbance at 570 nm. One unit of  
390 enzymatic activity was defined as 1 µmol NADH or NCDH produced per minute.

## 391 **Inhibition based uptake assay**

392 *E. coli* samples were assayed at an initial OD of 1 in MOPS medium. For each  
393 sample, 0.5 mL of cells was mixed with NAD (50 µM) and an excess of the NXD  
394 being tested for uptake (500 µM) to a final volume of 1 mL. The mixture was  
395 incubated at 30 °C for 8 h. Then the intracellular NAD was extracted as described  
396 above. All the samples were stored at -80 °C before NAD concentration analysis.

## 397 **Utilization of NXD by YJE003**

398 The colonies of NAD auxotrophic mutant YJE003 were picked into LB medium  
399 containing 0.1 mM NAD and cultivated overnight at 37 °C, 200 rpm. Then, the cells  
400 were diluted to OD<sub>600</sub> ~ 0.1 or 0.3 in LB supplemented with 50 µM NXD and

401 cultivated with shaking for 12 h. Then OD<sub>600</sub> was measured and 1 mL samples were  
402 collected for measuring intracellular NAD. The cells were collected and washed with  
403 ice-cold PBS buffer and used for intracellular NAD measurements. 1 mL of culture  
404 supernatants were quenched by adding 0.1 mL of 2 M HCl and incubated at 50 °C for  
405 10 min, and then the mixtures were neutralized by 0.1 mL of 1 M NaOH. All the  
406 samples were stored at –80 °C before NAD concentration analysis.

## 407 **ACKNOWLEDGEMENTS**

408 We thank H. Ekkehard Neuhaus (Technische Universität Kaiserslautern, Germany)  
409 and Ferdinando Palmieri (Università degli Studi di Bari Aldo Moro, Italy) for  
410 providing AtNDT2. This study was funded by National Natural Science Foundation of  
411 China (grant number 21708003, 31470787) and Science and Technology Research  
412 Project of Jilin Province, China (grant number 20170519015JH).

## 413 **REFERENCES**

- 414 1. Croft T, James Theoga Raj C, Salemi M, Phinney BS, Lin SJ. 2018. A functional link between  
415 NAD(+) homeostasis and N-terminal protein acetylation in *Saccharomyces cerevisiae*. *J Biol*  
416 *Chem* 293:2927-2938.
- 417 2. Wang P, Yang X, Lin B, Huang J, Tao Y. 2017. Cofactor self-sufficient whole-cell biocatalysts for  
418 the production of 2-phenylethanol. *Metab Eng* 44:143-149.
- 419 3. Xu W, Chan K, Kool E. 2017. Fluorescent nucleobases as tools for studying DNA and RNA. *Nat*  
420 *Chem* 9:1043-1055.
- 421 4. Ji D, Wang L, Hou S, Liu W, Wang J, Wang Q, Zhao ZK. 2011. Creation of bioorthogonal redox  
422 systems depending on nicotinamide flucytosine dinucleotide. *J Am Chem Soc*  
423 133:20857-20862.
- 424 5. Wang L, Ji D, Liu Y, Wang Q, Wang X, Zhou YJ, Zhang Y, Liu W, Zhao ZK. 2017. Synthetic  
425 cofactor-linked metabolic circuits for selective energy transfer. *ACS Catal* 7:1977–1983.
- 426 6. Akkaya Ö, Pérez-Pantoja DR, Calles B, Nikel PI, Lorenzo Vd. 2018. The Metabolic Redox  
427 Regime of *Pseudomonas putida* Tunes Its Evolvability toward Novel Xenobiotic Substrates.  
428 *mBio* 9:e01512-18.
- 429 7. Liu J, Li H, Zhao G, Caiyin Q, Qiao J. 2018. Redox cofactor engineering in industrial  
430 microorganisms: strategies, recent applications and future directions. *J Ind Microbiol*  
431 *Biotechnol* 45:313-327.
- 432 8. Nikiforov A, Kulikova V, Ziegler M. 2015. The human NAD metabolome: Functions,  
433 metabolism and compartmentalization. *Crit Rev Biochem Mol Biol* 50:284-97.
- 434 9. Lencina AM, Franza T, Sullivan MJ, Ulett GC, Ipe DS, Gaudu P, Gennis RB, Schurig-Briccio LA.  
435 2018. Type 2 NADH Dehydrogenase Is the Only Point of Entry for Electrons into the

- 436 Streptococcus agalactiae Respiratory Chain and Is a Potential Drug Target. mBio 9:e01034-18.
- 437 10. Neggens JE, Kwanten B, Dierckx T, Noguchi H, Voet A, Bral L, Minner K, Massant B, Kint N,  
438 Delforge M. 2018. Target identification of small molecules using large-scale CRISPR-Cas  
439 mutagenesis scanning of essential genes. Nat Commun 9:754.
- 440 11. Halle F, Fin A, Rovira AR, Tor Y. 2018. Emissive Synthetic Cofactors: Enzymatic Interconversions  
441 of (tz) A Analogues of ATP, NAD(+) , NADH, NADP(+) , and NADPH. Angew Chem Int Ed Engl  
442 57:1087-1090.
- 443 12. Palmieri F, Rieder B, Ventrella A, Blanco E, Do PT, Nunes-Nesi A, Trauth AU, Fiermonte G,  
444 Tjaden J, Agrimi G, Kirchberger S, Paradies E, Fernie AR, Neuhaus HE. 2009. Molecular  
445 identification and functional characterization of *Arabidopsis thaliana* mitochondrial and  
446 chloroplastic NAD(+) carrier proteins. J Biol Chem 284:31249-31259.
- 447 13. Gulshan M, Yaku K, Okabe K, Mahmood A, Sasaki T, Yamamoto M, Hikosaka K, Usui I,  
448 Kitamura T, Tobe K, Nakagawa T. 2018. Overexpression of Nmnat3 efficiently increases NAD  
449 and NGD levels and ameliorates age-associated insulin resistance. Aging Cell  
450 doi:10.1111/ace1.12798:e12798.
- 451 14. Haferkamp I, Schmitz-Esser S, Linka N, Urbany C, Collingro A, Wagner M, Horn M, Neuhaus HE.  
452 2004. A Candidate NAD+ Transporter in an Intracellular Bacterial Symbiont Related to  
453 Chlamydiae. Nature 432:622-625.
- 454 15. Todisco S, Agrimi G, Castegna A, Palmieri F. 2006. Identification of the mitochondrial NAD(+)  
455 transporter in *Saccharomyces cerevisiae*. J Biol Chem 281:1524-1531.
- 456 16. Maria Antonietta DN, Simona T, Angela C, Teresa R, Gennaro A, Vito I, Ferdinando P. 2014.  
457 The human SLC25A33 and SLC25A36 genes of solute carrier family 25 encode two  
458 mitochondrial pyrimidine nucleotide transporters. J Biol Chem 289:33137.
- 459 17. Feldman AW, Fischer EC, Ledbetter MP, Liao JY, Chaput JC, Romesberg FE. 2018. A Tool for the  
460 Import of Natural and Unnatural Nucleoside Triphosphates into Bacteria. J Am Chem Soc  
461 140:1447-1454.
- 462 18. Zhou YJ, Yang W, Wang L, Zhu Z, Zhang S, Zhao ZK. 2013. Engineering NAD+ availability for  
463 *Escherichia coli* whole-cell biocatalysis: a case study for dihydroxyacetone production. Microb  
464 Cell Fact 12:103.
- 465 19. Wang L, Zhou Y, Ji D, Lin X, Liu Y, Zhang Y, Liu W, Zhao ZK. 2014. Identification of UshA as a  
466 major enzyme for NAD degradation in *Escherichia coli*. Enzyme Microb Technol 58-59:75-79.
- 467 20. Grozio A, Sociali G, Sturla L, Caffa I, Soncini D, Salis A, Raffaelli N, De FA, Nencioni A, Bruzzone  
468 S. 2013. CD73 protein as a source of extracellular precursors for sustained NAD+ biosynthesis  
469 in FK866-treated tumor cells. J Biol Chem 288:25938-25949.
- 470 21. Malyshev DA, Dhami K, Lavergne T, Chen T, Dai N, Foster JM, Corrêa JI, Romesberg FE. 2014. A  
471 semi-synthetic organism with an expanded genetic alphabet. Nature 509:385-388.
- 472 22. Zhou YJ, Wang L, Yang F, Lin XP, Zhang SF, Zhao ZBK. 2011. Determining the extremes of the  
473 cellular NAD(H) level by using an *Escherichia coli* NAD+-auxotrophic mutant. Appl Environ  
474 Microbiol 77:6133-6140.
- 475 23. Ali TH, El-Ghonemy DH. 2016. Purification and characterization of the enzymes involved in  
476 nicotinamide adenine dinucleotide degradation by *Penicillium brevicompactum* NRC 829. 3  
477 Biotech 6.
- 478 24. Rittmann D, Sorger-Herrmann U, Wendisch VF. 2005. Phosphate starvation-inducible gene  
479 *ushA* encodes a 5' nucleotidase required for growth of *Corynebacterium glutamicum* on

- 480 media with nucleotides as the phosphorus source. *Appl Environ Microbiol* 71:4339-4344.
- 481 25. Ast M, Gruber A, Schmitzesser S, Neuhaus HE, Kroth PG, Horn M, Haferkamp I. 2009. Diatom  
482 plastids depend on nucleotide import from the cytosol. *Proc Natl Acad Sci USA*  
483 106:3621-3626.
- 484 26. Trammell SA, Schmidt MS, Weidemann BJ, Redpath P, Jaksch F, Dellinger RW, Li Z, Abel ED,  
485 Migaud ME, Brenner C. 2016. Nicotinamide riboside is uniquely and orally bioavailable in  
486 mice and humans. *Nat Commun* 7:12948.
- 487 27. Agrimi G, Russo A, Scarcia P, Palmieri F. 2012. The human gene SLC25A17 encodes a  
488 peroxisomal transporter of coenzyme A, FAD and NAD<sup>+</sup>. *Biochem J* 443:241-247.
- 489 28. Korn A, Ajlani G, Lagoutte B, Gall A, Setif P. 2009. Ferredoxin:NADP<sup>+</sup> oxidoreductase  
490 association with phycocyanin modulates its properties. *J Biol Chem* 284:31789-97.
- 491 29. Datsenko KA, Wanner BL. 2000. One-step inactivation of chromosomal genes in *Escherichia*  
492 *coli* K-12 using PCR products. *Proc Natl Acad Sci USA* 97:6640-6645.
- 493 30. Baba T, Ara T, Hasegawa M, Takai Y, Okumura Y, Baba M, Datsenko KA, Tomita M, Wanner BL,  
494 Mori H. 2006. Construction of *Escherichia coli* K-12 in-frame, single-gene knockout mutants:  
495 the Keio collection. *Mol Syst Biol* 2:2006 0008.
- 496 31. Wang L, Zhou YJ, Ji D, Zhao ZK. 2013. An accurate method for estimation of the intracellular  
497 aqueous volume of *Escherichia coli* cells. *J Microbiol Methods* 93:73-76.
